# Supplementary material
Source: MDPI journal article supplement (https://www.mdpi.com/2079-9284/11/1/10)
Supplement: s1 [file s1]

## Effectiveness of a Novel Compound HAIR & SCALP COMPLEX on Hair Follicle Regeneration

Greta Ferruggia <sup>1</sup>, Martina Contino <sup>1</sup>, Massimo Zimbone <sup>2</sup> and Maria Violetta Brundo <sup>1,\*</sup>

<sup>1</sup> Department of Biological, Geological and Environmental Sciences, University of Catania,  
Via Androne 81, 95124 Catania, Italy; greta.ferruggia@phd.unict.it (G.F.);  
martina.contino@phd.unict.it (M.C.)

<sup>2</sup> Institute for Microelectronics and Microsystems, National Research Council of Italy (CNR-IMM),  
95123 Catania, Italy; massimo.zimbone@ct.infn.it

\* Correspondence: mariavioletta.brundo@unict.it; Tel.: +39-0957306039

### Supplementary materials

**Table S1.** Concentration of 20 bioactive molecules of GF20 characterized by ELISA test.

| Bioactive molecules | Log Concentration (pg/mL) |
|---------------------|---------------------------|
| GM-CSF              | 3.963 ± 0.38              |
| bFGF                | 3.955 ± 0.49              |
| TGF- $\beta$        | 3.5 ± 0.15                |
| HGF                 | 3.42 ± 0.15               |
| IFN- $\gamma$       | 3.35 ± 0.38               |
| SDF-1 $\alpha$      | 3.32 ± 0.3                |
| VEGF                | 3.31 ± 0.426              |
| IL-2                | 3.29 ± 0.3                |
| IGF-1               | 3.1 ± 0.08                |
| BMP-2               | 3.1 ± 0.27                |
| IL-17A              | 3.04 ± 0.477              |
| G-CSF               | 2.85 ± 0.27               |
| PDGF                | 2.766 ± 0.354             |
| NGF                 | 2.622 ± 0.832             |
| KGF                 | 2.61 ± 0.4                |
| EGF                 | 2.41 ± 0.36               |
| EOTAXIN             | 2.4 ± 0.37                |
| TNF- $\alpha$       | 2.305 ± 0.356             |
| IL-6                | 1.81 ± 0.3                |
| IL-4                | 0.95 ± 0.049              |

Data were reported as Log Concentration ± standard deviation.
